# Supplementary material for: Pro-Apoptotic Potential of Pseudevernia furfuracea (L.) Zopf Extract and Isolated Physodic Acid in Acute Lymphoblastic Leukemia Model In Vitro
Source: MDPI journal article supplement (doi:10.3390/pharmaceutics13122173), 2021-12-16
Supplement: s1 [file s1]

# Supplementary Materials: Pro-Apoptotic Potential of *Pseudevernia furfuracea* (L.) Zopf Extract and Isolated Physodic Acid in Acute Lymphoblastic Leukemia Model In Vitro

Martin Kello, Tomas Kuruc, Klaudia Petrova, Michal Goga, Zuzana Michalova, Matus Coma, Dajana Rucova and Jan Mojzis

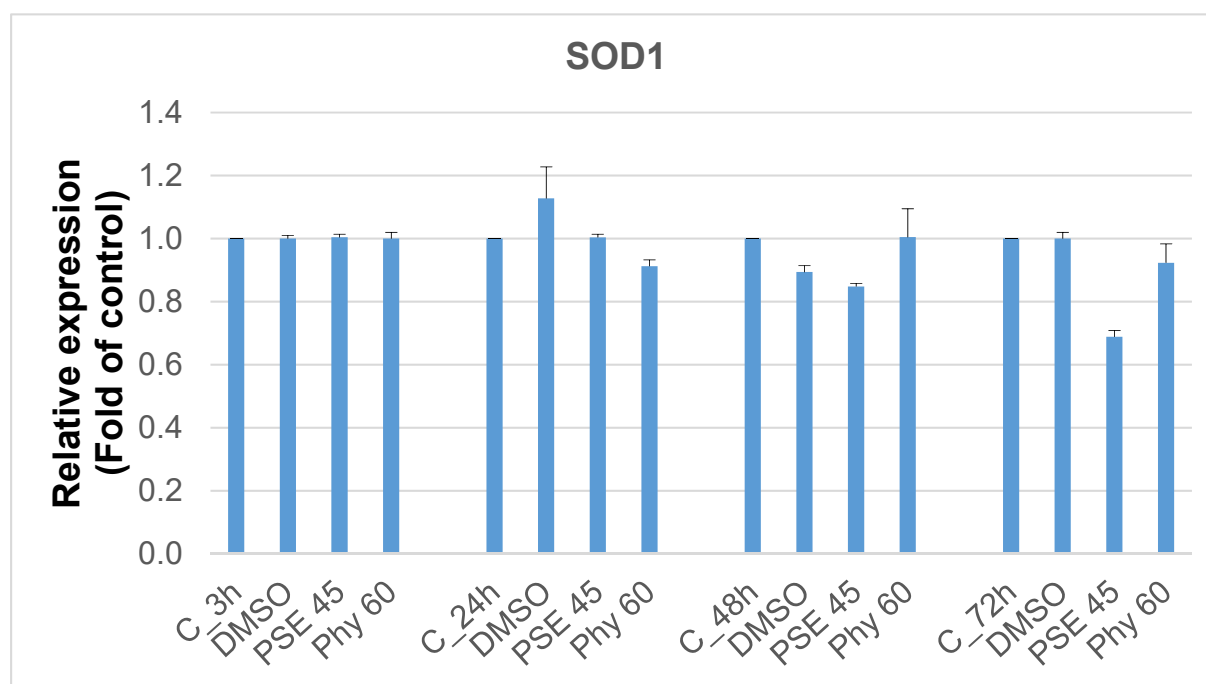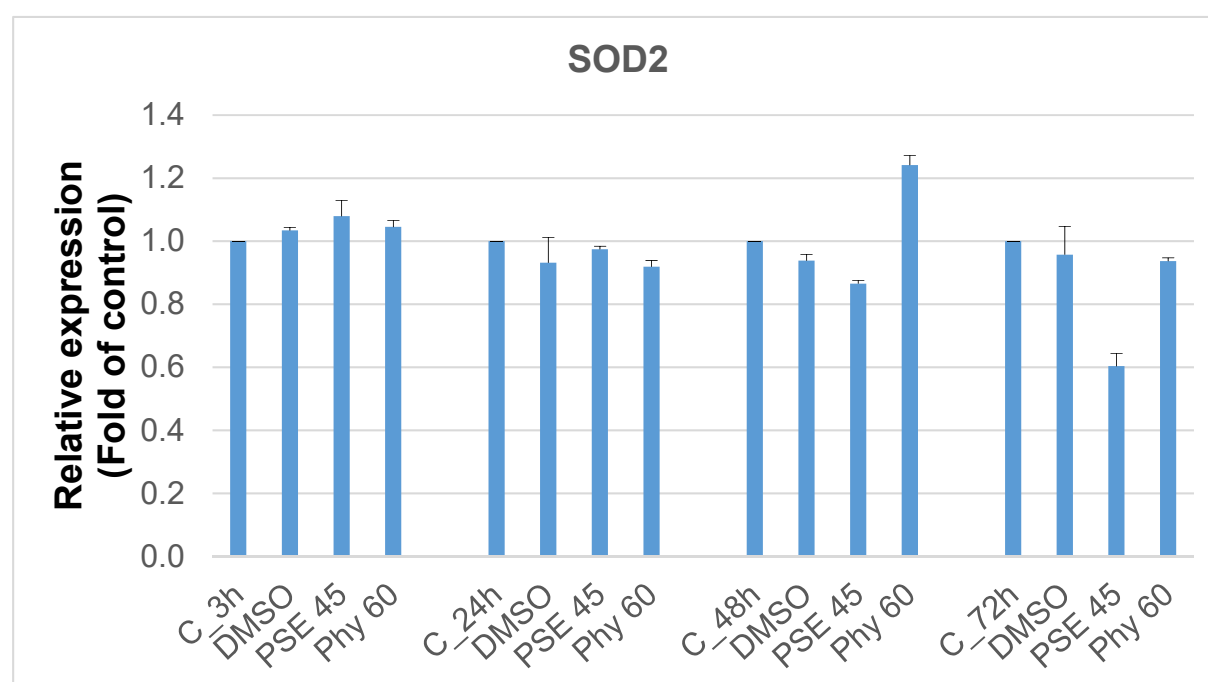

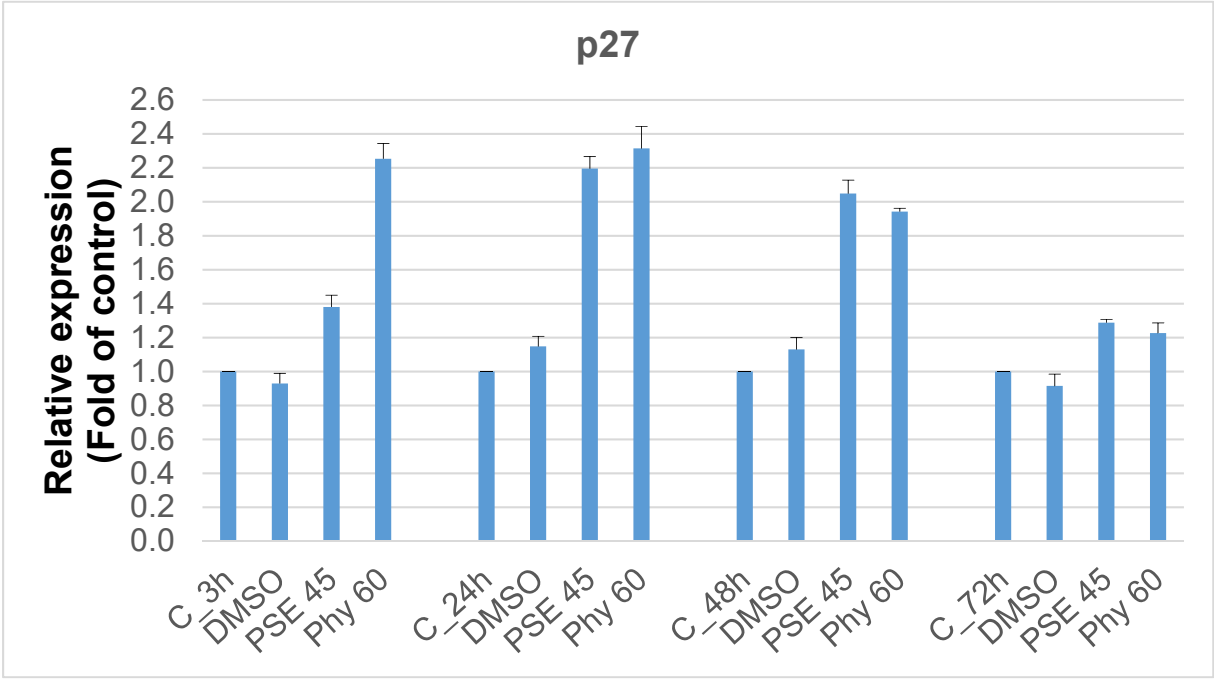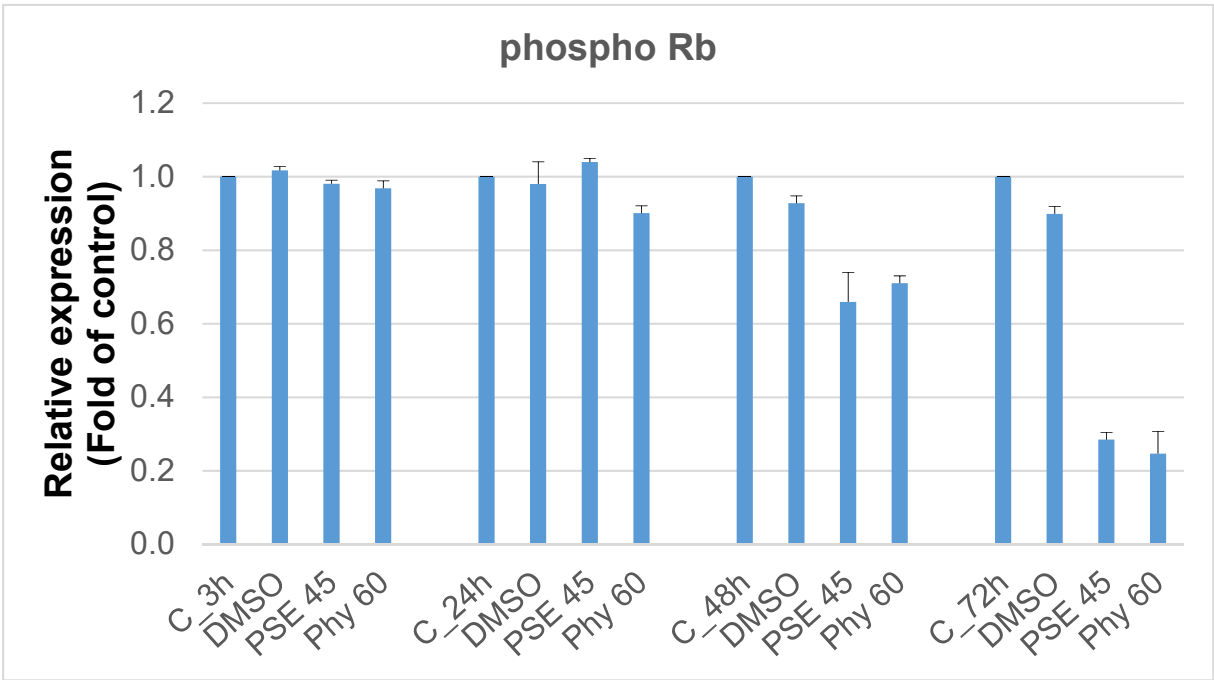

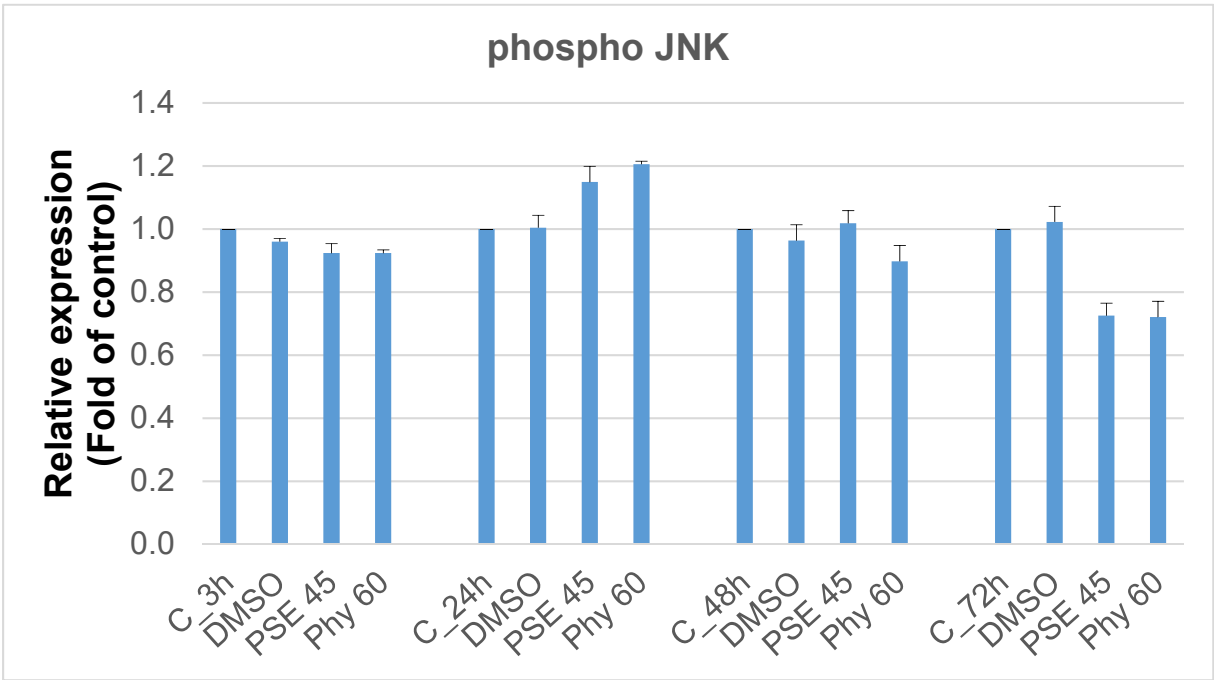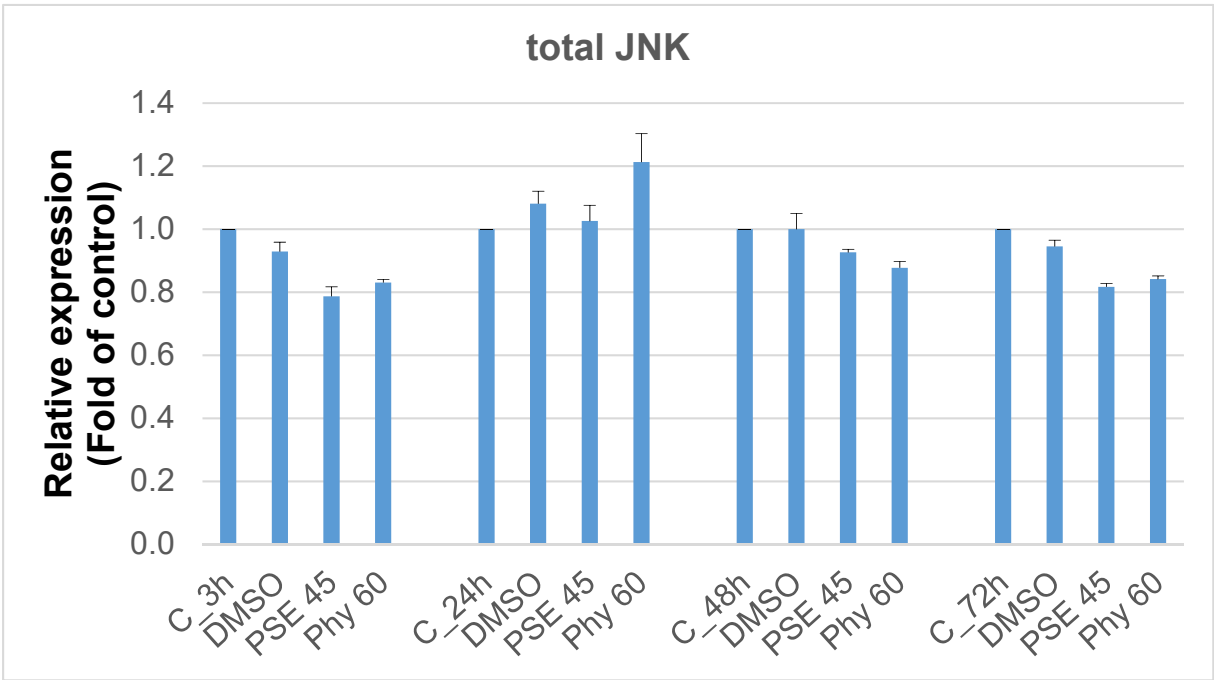

### phospho p38 MAPK

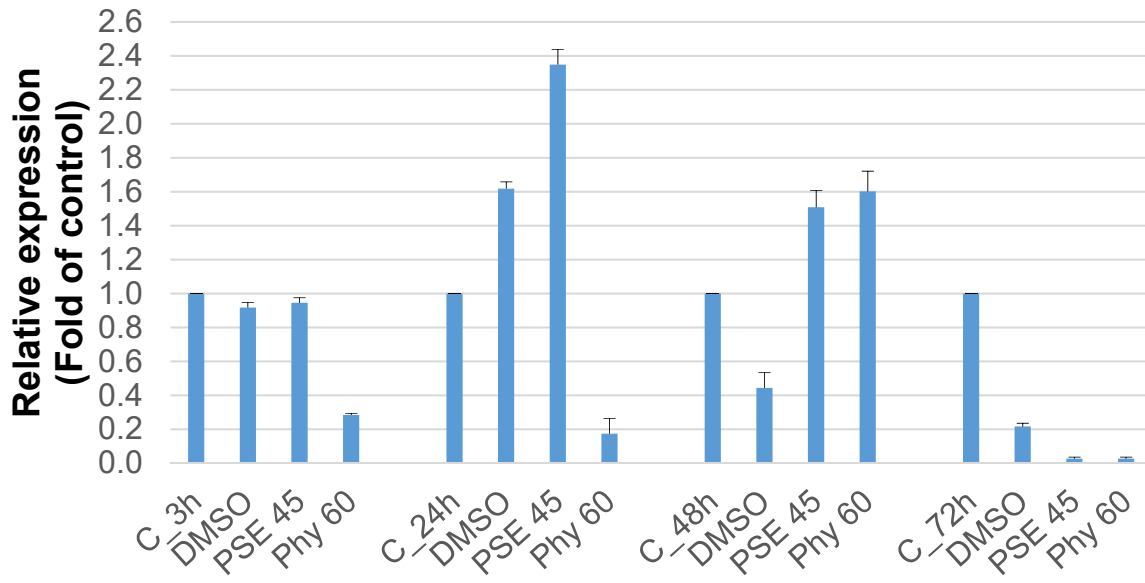

### total p38 MAPK

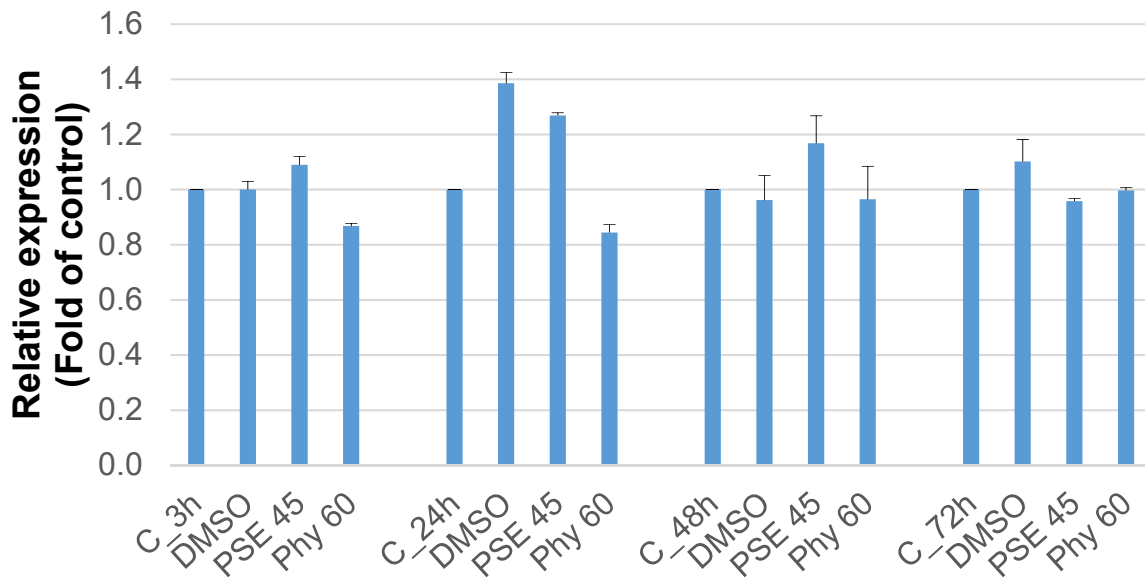

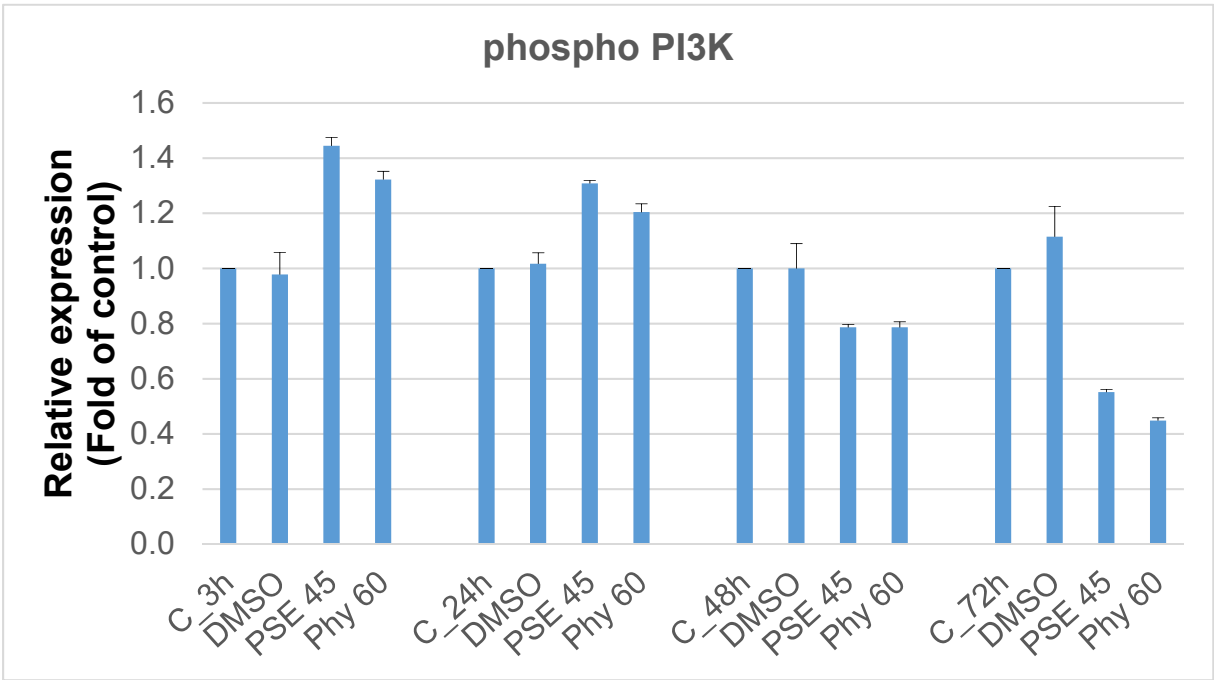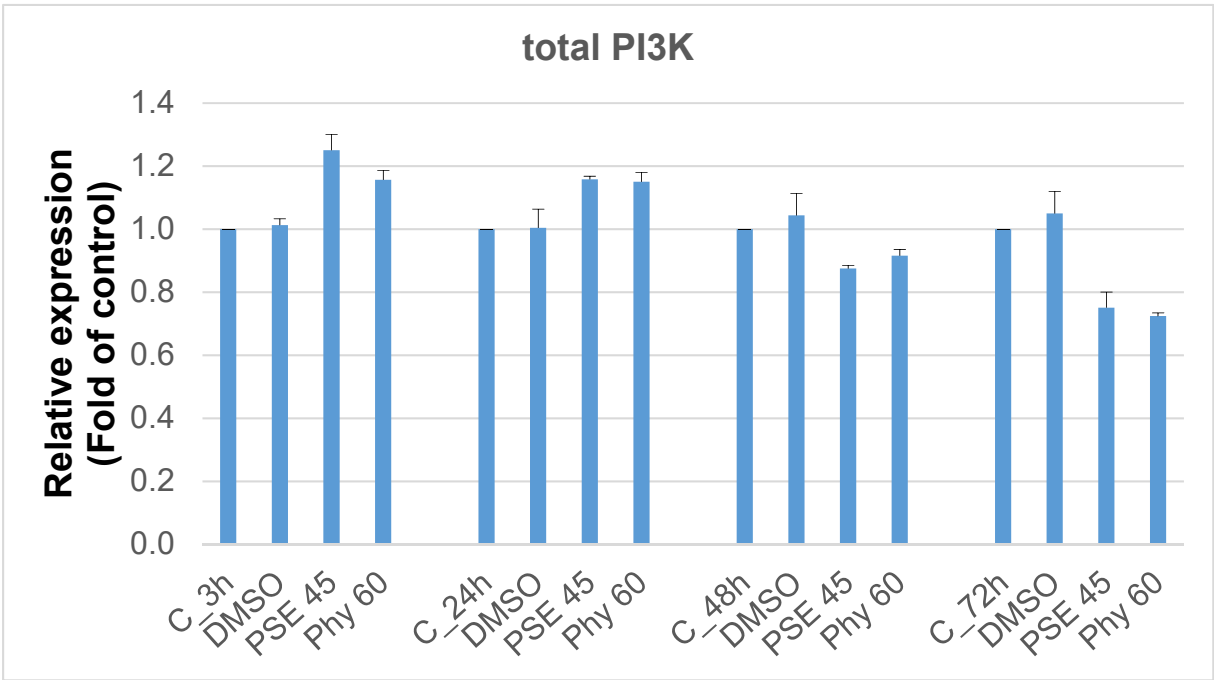

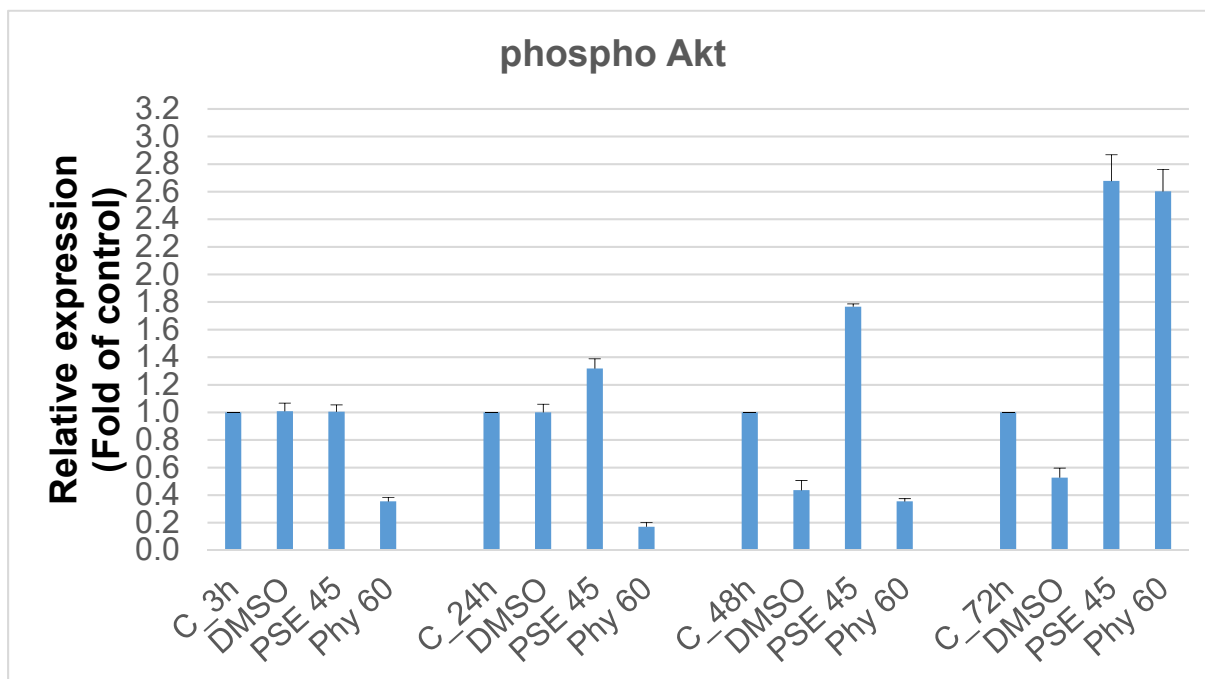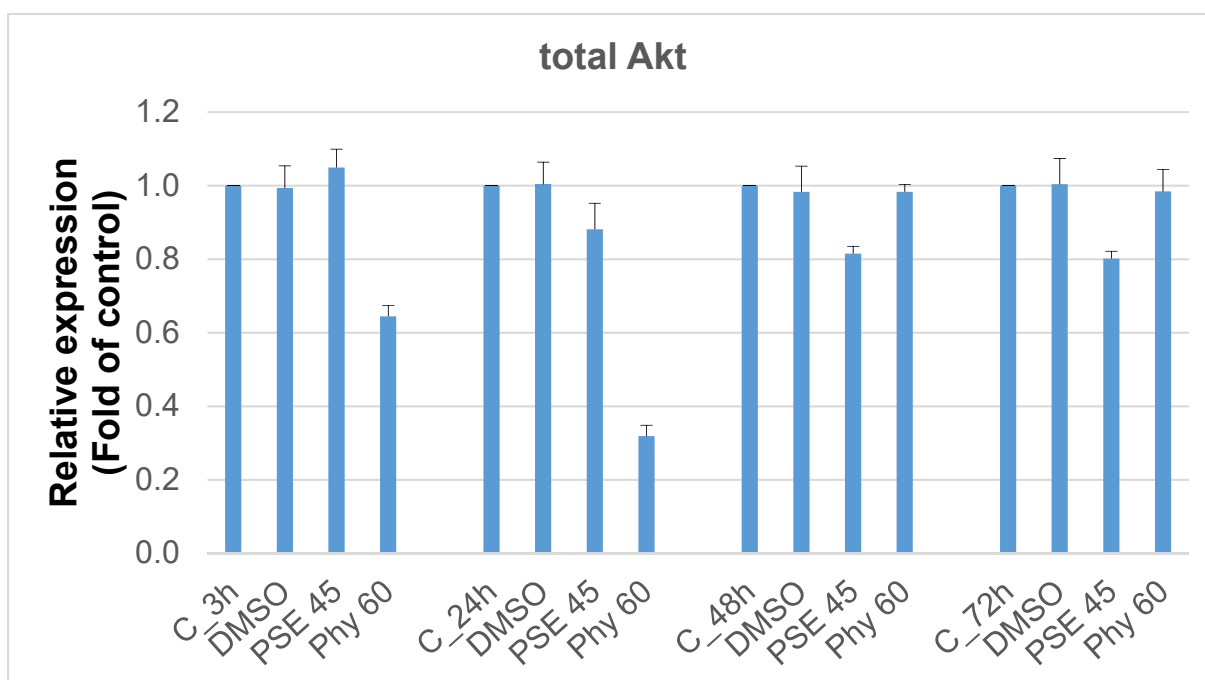

Supplementary file S1: Densitometry graphs from all Western blot analyses.
